# Supplementary material for: Key role of persistent free radicals in soil for persulfate activation: impacts on benzo[a]pyrene degradation
Source: Royal Society of Chemistry journal article supplement (doi:10.1039/d4em00437j), 2025-01-01
Supplement: d4em00437j1.pdf [file d4em00437j1.pdf]

1 **Supporting Information**

2 **Key role of persistent free radicals in soil for persulfate activation: Impacts**  
3 **to benzo[a]pyrene degradation**

4  
5 Yiwen Ou,<sup>a</sup> Xintong Li,<sup>a</sup> Shixu Feng<sup>a</sup> and Hongxia Zhao<sup>a,\*</sup>

6  
7  
8 <sup>a</sup> Key Laboratory of Industrial Ecology and Environmental Engineering (Ministry of  
9 Education), School of Environmental Science and Technology, Dalian University of  
10 Technology, Dalian, 116024, China

11  
12  
13  
14  
15  
16  
17  
18  
19  
20  
21 \*Corresponding author phone: +86-411-84706552; Fax: +86-411-84706552

22 Email: [hxzhao@dlut.edu.cn](mailto:hxzhao@dlut.edu.cn)

23 **Text S1:** Characteristics of soil sample

24       The amount of soil organic matter (SOM) was determined at 550 °C, 4 h in a Muffle  
25 furnace. Soil pH was measured in 1:2.5 soil/water suspensions. X-ray Fluorescence  
26 Spectrometer (XRF, Axios, Panaco, Holland) was performed for understanding the inorganic  
27 element composition of the soil.

28 **Text S2:** ROS detection

29 As for the detection of ROS in the reaction system, persulfate solution was added to  
30 B[a]P contaminated soil and the spin trap DMPO and TEMP was 100 mM, respectively.  
31 Methanol salt solution was added as a  $\bullet\text{OH}$  quencher for the detection of  $\bullet\text{O}_2^-$ . A 10  $\mu\text{L}$   
32 suspension was collected by capillary tubes at different points in time to measure the ROS  
33 signal by EPR. Typical EPR instrument parameters were: center field at 3510 G, X-band  
34 microwave frequency of 9.85 GHz, microwave power of 1.70 mW, spectral window of 100 G,  
35 modulation amplitude of 1.00 G, modulation frequency of 100 kHz, time constant of 163.84  
36 ms, conversion time 40.00 ms, sweep time 40.96 s and 5 times of X-scans.

37 **Text S3:** Extraction and fractionation of soil samples

38 After freeze-drying for 48 h, the soil samples were extracted and fractionated. The  
39 extraction details are as follows:<sup>1</sup> the freeze-dried soil samples were extracted treated by a  
40 mixing solution (ACE and DCM, 1:1, v/v) for 30 min in an ultrasonic environment. The  
41 supernatant was extracted by centrifugation at 3000 r/min for 10 min, repeated extraction for  
42 3 times, then collected and combined the extraction. The total collected extracts were  
43 concentrated to 1 mL under a gentle nitrogen atmosphere. Subsequently, the concentrated  
44 extracts were cleaned up by the silica gel column, which contain 1 cm anhydrous sodium  
45 sulfate, 3 cm deactivated silica gel, 2 cm deactivated aluminium oxide and 2 cm anhydrous  
46 sodium sulfate from top to bottom. The silica gel column was activated with 10 mL HEX and  
47 eluted with 30 mL of HEX: DCM (7:3, v/v). The eluent containing B[a]P were collected, and  
48 then concentrated to near dryness with a nitrogen stream and reconstituted with ACN/HEX to  
49 a final volume of 1 mL transferring to a chromatographic vial. Before analysis, the extract  
50 was passed through a 0.22 m PTFE membrane.

**Table S1.** General assignments of FT-IR spectra of soil.

| Wavenumber (cm <sup>-1</sup> ) | Mineral horizons                                                                   | Organic horizons                                                                                  | Reference |
|--------------------------------|------------------------------------------------------------------------------------|---------------------------------------------------------------------------------------------------|-----------|
| ~3620                          | Clay O-H stretching                                                                | n/a                                                                                               | 2         |
| ~3431                          | Water, stretching                                                                  | O-H stretching (carboxylic acids/phenols/ alcohols);<br>N-H stretching (amine/amide)              | 3         |
| ~2931, ~2848                   | n/a                                                                                | C-H stretching (Aliphatics)                                                                       | 4         |
| ~1882                          | n/a                                                                                | C=O stretching                                                                                    | 5         |
| ~1639                          | n/a                                                                                | C=C (aromatic structure);<br>C=O (amides/quinones /COO <sup>-</sup> /H-bonded conjugated ketones) | 6         |
| ~1419                          | Mg-OH stretching                                                                   | C-O stretching                                                                                    | 7         |
| ~1014                          | Si-O stretching lattice                                                            | C-O stretching (polysaccharides/cellulose)                                                        | 8         |
| ~908                           | Al-OH stretching<br>OH bending modes of the inner hydroxyl groups of clay minerals | n/a                                                                                               | 9         |
| ~773                           | Mg-OH, Al-OH                                                                       | n/a                                                                                               | 5         |
| ~690                           | SiO <sub>2</sub> , Si-O-Si bending, lattice                                        | n/a                                                                                               | 5         |
| ~536, ~460                     | -Si-O bond                                                                         | n/a                                                                                               | 10        |

**Table S2.** B[a]P degradation intermediates were identified by GC-MS.

| Peak | RT (min) | MW  | formula                                        | Product                                      |
|------|----------|-----|------------------------------------------------|----------------------------------------------|
| P1   | 22.82    | 362 | C <sub>22</sub> H <sub>34</sub> O <sub>4</sub> | 1,2-Benzenedicarboxylic acid, diheptyl ester |
| P2   | 19.37    | 282 | C <sub>20</sub> H <sub>42</sub>                | Eicosane                                     |
| P3   | 17.81    | 278 | C <sub>16</sub> H <sub>22</sub> O <sub>4</sub> | Dibutyl phthalate                            |
| P4   | 16.43    | 270 | C <sub>17</sub> H <sub>34</sub> O <sub>2</sub> | Isopropyl myristate                          |
| P5   | 15.13    | 226 | C <sub>16</sub> H <sub>34</sub>                | Hexadecane                                   |
| P6   | 12.85    | 206 | C <sub>14</sub> H <sub>22</sub> O              | 2,4-Di-tert-butylphenol                      |
| P7   | 8.52     | 170 | C <sub>12</sub> H <sub>26</sub>                | Dodecane                                     |

**Table S3.** Toxicity classification according to the Globally Harmonized System of Classification and Labelling of Chemicals.

| Level       | Acute toxicity                                     | Chronic toxicity    |
|-------------|----------------------------------------------------|---------------------|
| Not Harmful | LC <sub>50</sub> /EC <sub>50</sub> > 100 mg/L      | ChV > 100 mg/L      |
| Harmful     | 10 < LC <sub>50</sub> /EC <sub>50</sub> ≤ 100 mg/L | 10 < ChV ≤ 100 mg/L |
| Toxic       | 1 < LC <sub>50</sub> /EC <sub>50</sub> ≤ 10 mg/L   | 1 < ChV ≤ 10 mg/L   |
| Very Toxic  | LC <sub>50</sub> /EC <sub>50</sub> ≤ 1 mg/L        | ChV ≤ 1 mg/L        |

**Table S4.** Estimated toxicity of B[a]P and degradation products.

| <b>Products</b> | <b>Acute toxicity (mg/L)</b>           |                                           |                                                   | <b>Chronic toxicity (mg/L)</b> |                          |                                  |
|-----------------|----------------------------------------|-------------------------------------------|---------------------------------------------------|--------------------------------|--------------------------|----------------------------------|
|                 | <b>Fish<br/>(96 h-LC<sub>50</sub>)</b> | <b>Daphnid<br/>(48 h-LC<sub>50</sub>)</b> | <b>Green<br/>Alage<br/>(96 h-EC<sub>50</sub>)</b> | <b>Fish<br/>(ChV)</b>          | <b>Daphnid<br/>(ChV)</b> | <b>Green<br/>Alage<br/>(ChV)</b> |
| B[a]P           | 0.042                                  | 0.035                                     | 0.125                                             | 0.0065                         | 0.0098                   | 0.076                            |
| P1              | 0.019                                  | 0.029                                     | 0.0053                                            | 0.0024                         | 0.0012                   | 0.0015                           |
| P2              | 0.000011                               | 0.000013                                  | 0.00022                                           | 0.0000026                      | 0.000010                 | 0.00031                          |
| P3              | 0.893                                  | 0.748                                     | 0.527                                             | 0.079                          | 0.143                    | 0.205                            |
| P4              | 0.005                                  | 0.04                                      | 0.0074                                            | 0.00086                        | 0.0017                   | 0.0019                           |
| P5              | 0.0005                                 | 0.00051                                   | 0.004                                             | 0.000097                       | 0.00024                  | 0.0038                           |
| P6              | 0.144                                  | 0.133                                     | 0.206                                             | 0.02                           | 0.031                    | 0.067                            |
| P7              | 0.022                                  | 0.018                                     | 0.069                                             | 0.0034                         | 0.0054                   | 0.043                            |

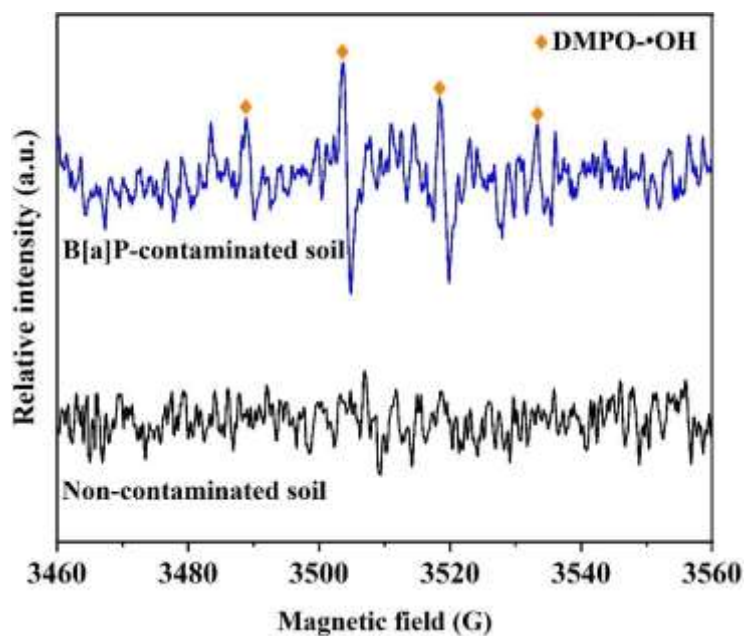

Fig. S1. DMPO•OH in H<sub>2</sub>O/B[a]P contaminated soil system.

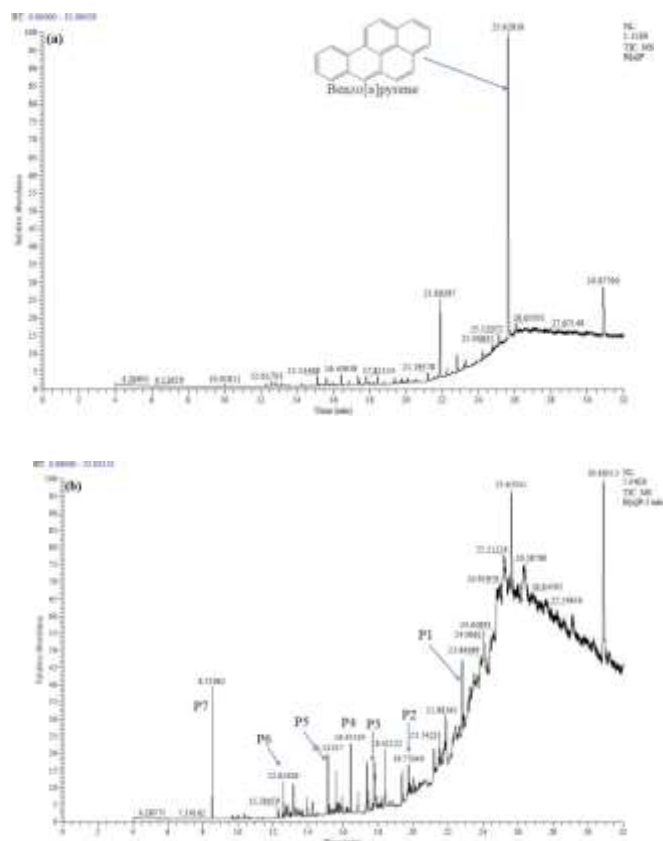

Fig. S2. GC-MS chromatogram of B[a]P- contaminated soil (a) and B[a]P transformation in persulfate system (b).



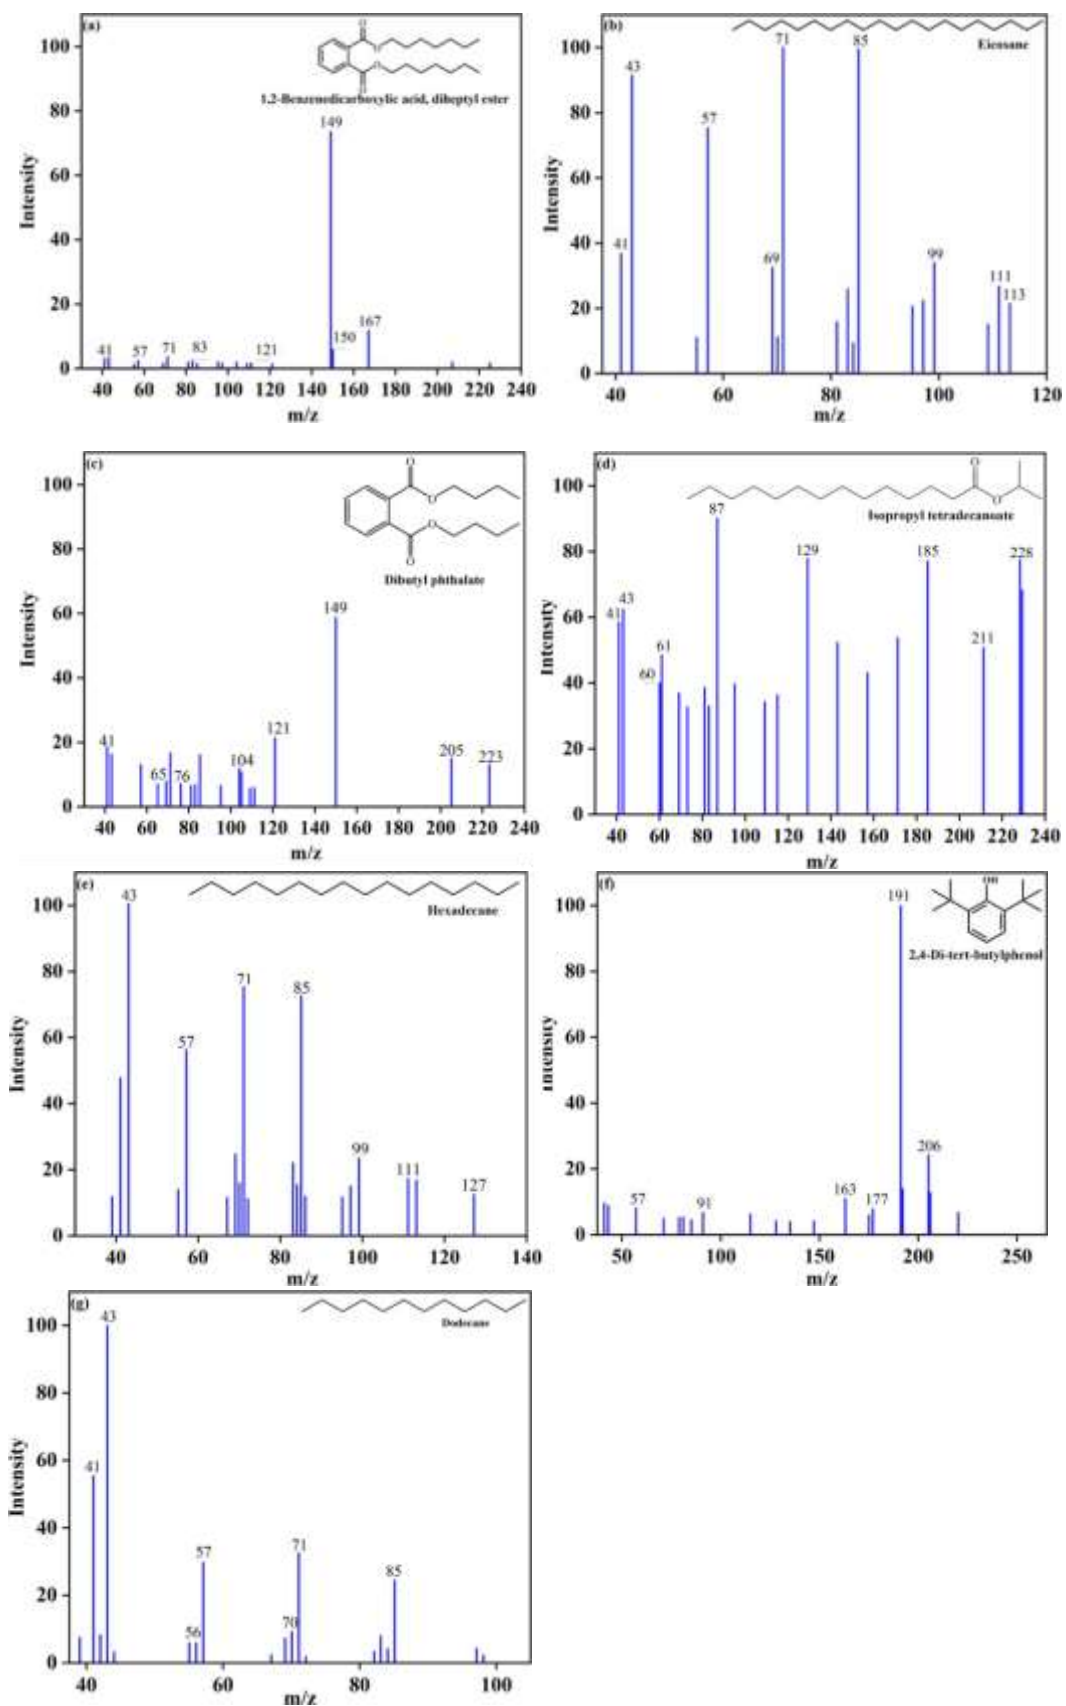

**Fig. S3.** The mass spectra of the derivatives of the possible intermediates.

51 **References**

- 52 1 X. N. Zhang, C. Y. Huang, J. Ren, T. G. Bekele and H. X. Zhao, Effect of cyclodextrin on  
53 desorption of petroleum hydrocarbons in soil, *Process Safety and Environmental Protection*,  
54 2022, **160**, 199-208. <http://doi.org/10.1016/j.psep.2022.02.023>
- 55 2 F. Tivet, J. C. de Moraes Sá, R. Lal, D. M. B. P. Milori, C. Briedis, P. Letourmy, L. A.  
56 Pinheiro, P. R. Borszowski and D. da Cruz Hartman, Assessing humification and organic C  
57 compounds by laser-induced fluorescence and FTIR spectroscopies under conventional and  
58 no-till management in Brazilian Oxisols, *Geoderma*, 2013, **207-208**, 71-81.  
59 <http://doi.org/10.1016/j.geoderma.2013.05.001>
- 60 3 C. Peltre, S. Bruun, C. Du, I. K. Thomsen and L. S. Jensen, Assessing soil constituents and  
61 labile soil organic carbon by mid-infrared photoacoustic spectroscopy, *Soil Biology and*  
62 *Biochemistry*, 2014, **77**, 41-50. <http://doi.org/10.1016/j.soilbio.2014.06.022>
- 63 4 R. Matamala, F. J. Calderón, J. D. Jastrow, Z. Fan, S. M. Hofmann, G. J. Michaelson, U.  
64 Mishra and C.-L. Ping, Influence of site and soil properties on the DRIFT spectra of northern  
65 cold-region soils, *Geoderma*, 2017, **305**, 80-91.  
66 <http://doi.org/10.1016/j.geoderma.2017.05.014>
- 67 5 P. K. Krivoshein, D. S. Volkov, O. B. Rogova and M. A. Proskurnin, FTIR photoacoustic  
68 spectroscopy for identification and assessment of soil components: Chernozems and their size  
69 fractions, *Photoacoustics*, 2020, **18**, 100162. <http://doi.org/10.1016/j.pacs.2020.100162>
- 70 6 C. Cocozza, V. D'Orazio, T. M. Miano and W. Shotykb, Characterization of solid and  
71 aqueous phases of a peat bog profile using molecular fluorescence spectroscopy, ESR and FT-  
72 IR, and comparison with physical properties, *Organic Geochemistry* 2003, **34** 49–60  
73 [http://doi.org/doi.org/10.1016/S0146-6380\(02\)00208-5](http://doi.org/doi.org/10.1016/S0146-6380(02)00208-5)
- 74 7 A. M. Hofmeister and J. E. Bowey, Quantitative Infrared Spectra of Hydrosilicates and  
75 Related Minerals, *Monthly Notices of the Royal Astronomical Society*, 2006, **367**(2), 577-591.  
76 <http://doi.org/10.1111/j.1365-2966.2006.09894.x>
- 77 8 Z. Xing, K. Tian, C. W. Du, C. Y. Li, J. M. Zhou and Z. K. Chen, Agricultural soil  
78 characterization by FTIR spectroscopy at micrometer scales: Depth profiling by photoacoustic  
79 spectroscopy, *Geoderma*, 2019, **335**, 94-103. <http://doi.org/10.1016/j.geoderma.2018.08.003>

80 9 X. B. Xu, C. W. Du, F. Ma, Y. Z. Shen and J. Zhou, Forensic soil analysis using laser-  
81 induced breakdown spectroscopy (LIBS) and Fourier transform infrared total attenuated  
82 reflectance spectroscopy (FTIR-ATR): Principles and case studies, Forensic. Sci. Int., 2020,  
83 **310**, 110222. <http://doi.org/10.1016/j.forsciint.2020.110222>  
84 10 Y. K. Li, Q. F. Liu, L. S. Liu, L. H. Liu, D. S. Hou and Y. K. Wu, Effect of original crystal  
85 size of kaolinite on the formation of intercalation compounds of coal-measure kaolinite,  
86 Materials Today Communications, 2023, **35**. <http://doi.org/10.1016/j.mtcomm.2023.106130>  
87
